# Supplementary material for: Creatine riboside is a cancer cell–derived metabolite associated with arginine auxotrophy
Source: JCI journal article supplement (doi:10.1172/jci157410), 2022-07-14
Supplement: sd1 [file 1]

1 **Supplemental Information**

2 **Creatine Riboside is a Cancer Cell-Derived Metabolite Associated with**

3 **Arginine Auxotrophy**

4 Parker et al.

5 Supplemental Table 1. *Clinicodemographic characteristics of the NCI -MD*  
 6 *NSCLC cohort.*

|                  |                       | Tissue Biospecimens |               |               |         | Urine Biospecimens |                    |                 |
|------------------|-----------------------|---------------------|---------------|---------------|---------|--------------------|--------------------|-----------------|
|                  |                       | All                 | CRLow         | CRHigh        | P-value | All                | CRLow              | CRHigh          |
| <b>Age</b>       | <i>mean<br/>± sd</i>  | 65.9 ±<br>9.44      | 67.0±10<br>.4 | 64.9<br>±8.61 | 0.32*   | 64.7±9<br>.67      | 63.0±9.<br>82      | 64.8±9.6<br>8   |
| <b>Gender</b>    | <i>Male</i>           | 50                  | 25<br>(59.5%) | 25<br>(59.5%) | >0.99   | 234                | 73<br>(45.1%)      | 161<br>(53.3%)  |
|                  | <i>Female</i>         | 34                  | 17<br>(40.5%) | 17<br>(40.8%) |         | 230                | 89<br>(54.94<br>%) | 141<br>(46.69%) |
| <b>Stage</b>     | <i>I</i>              | 1                   | 0 (0%)        | 1<br>(2.38%)  | 0.74§   | 29                 | 9<br>(5.6%)        | 20<br>(6.6%)    |
|                  | <i>IA</i>             | 20                  | 10<br>(23.8%) | 10<br>(23.8%) |         | 85                 | 46<br>(28.4%)      | 39<br>(12.9%)   |
|                  | <i>IB</i>             | 31                  | 14<br>(33.3%) | 17<br>(40.5%) |         | 77                 | 31<br>(19.1%)      | 46<br>(15.2%)   |
|                  | <i>II</i>             | 0                   | 0 (0%)        | 0 (0%)        |         | 6                  | 0 (0%)             | 6 (2.0%)        |
|                  | <i>IIA</i>            | 12                  | 7<br>(16.7%)  | 5<br>(11.9%)  |         | 12                 | 7<br>(4.32%)       | 5 (1.66%)       |
|                  | <i>IIB</i>            | 10                  | 5<br>(11.9%)  | 5<br>(11.9%)  |         | 33                 | 17<br>(10.5%)      | 16<br>(5.30%)   |
|                  | <i>III</i>            | 0                   | 0 (0%)        | 0 (0%)        |         | 23                 | 5<br>(3.1%)        | 18<br>(5.96%)   |
|                  | <i>IIIA</i>           | 9                   | 5<br>(11.9%)  | 4<br>(9.52%)  |         | 47                 | 9<br>(5.56%)       | 38<br>(12.6%)   |
|                  | <i>IIIB</i>           | 1                   | 1(2.38<br>%)  | 0 (0%)        |         | 45                 | 14<br>(8.6%)       | 31<br>(10.3%)   |
|                  | <i>IV</i>             | 0                   | 0 (0%)        | 0 (0%)        |         | 89                 | 20<br>(12.4%)      | 69<br>(22.9%)   |
|                  | <i>Unknown</i>        | 0                   | 0 (0%)        | 0 (0%)        |         | 18                 | 4<br>(2.5%)        | 14<br>(4.64%)   |
| <b>Histology</b> | <i>Adenocarcinoma</i> | 49                  | 25<br>(59.5%) | 24<br>(57.1%) | 0.30^   | 232                | 99<br>(61.11<br>%) | 135<br>(44.7%)  |
|                  | <i>Adenosquamous</i>  | 1                   | 1<br>(2.38%)  | 0 (0%)        |         | 4                  | 2<br>(1.22%)       | 2 (0.66%)       |

|                       |                                  |           |                |                |                   |           |                |                |
|-----------------------|----------------------------------|-----------|----------------|----------------|-------------------|-----------|----------------|----------------|
|                       | <i>Bronchoalveolar Carcinoma</i> | 2         | 2<br>(4.76%)   | 0 (0%)         |                   | 5         | 1<br>(0.62%)   | 4 (1.32%)      |
|                       |                                  |           |                |                |                   |           |                |                |
|                       | <i>NSCLC</i>                     | 3         | 2<br>(4.76%)   | 1<br>(2.38%)   |                   | 89        | 20<br>(12.3%)  | 69<br>(22.8%)  |
|                       | <i>Large cell carcinoma</i>      | 0         | 0 (0%)         | 0 (0%)         |                   | 2         | 1<br>(0.62%)   | 1 (0.33%)      |
|                       | <i>Squamous</i>                  | 26        | 10<br>(23.81%) | 16<br>(38.10%) |                   | 127       | 38<br>(23.5%)  | 89<br>(29.5%)  |
|                       | <i>Unknown</i>                   |           | 2<br>(4.76%)   | 1<br>(2.38%)   |                   | 1         | 1<br>(0.62%)   | 2 (0.66%)      |
| <b>Smoking Status</b> | <i>Never Smoker</i>              | 2         | 1<br>(2.38%)   | 1<br>(2.38%)   | 0.95 <sup>#</sup> | 33        | 11<br>(6.79%)  | 22<br>(7.28%)  |
|                       | <i>Ever Smoker</i>               | 35        | 19<br>(45.2%)  | 16<br>(38.1%)  |                   | 431       | 151            | 280<br>(92.7%) |
|                       | <i>Current Smoker</i>            | 14        | 8<br>(19.0%)   | 6<br>(14.3%)   |                   | 202       | 84<br>(51.85%) | 118<br>(39.1%) |
|                       | <i>Former Smoker</i>             | 21        | 11<br>(26.2%)  | 10<br>(23.8%)  |                   | 229       | 67<br>(41.4%)  | 162<br>(34.9%) |
|                       | <i>Unknown</i>                   | 47        | 22<br>(52.4%)  | 25<br>(59.52%) |                   | 0         | 0 (0%)         | 0 (0%)         |
| <b>Pack Years</b>     | <i>mean ±sd</i>                  | 47.4±28.3 | 40.5±27.0      | 43.7±30.2      | 0.56 <sup>*</sup> | 42.8±48.0 | 45.0±71.7      | 41.6±28.0      |

7 \* Statistical significance tested using Mann-Whitney non-parametric test.

8 §Fisher's exact test of early (stage I +II) vs late (stage III+IV)

9 ^ Fisher's exact test of adenocarcinoma vs squamous NSCLC.

10 # Fisher's exact test of never vs ever smoker

11

12

13 **Supplemental Table 2. Gene Set Enrichment Analysis of CR<sup>High</sup> and CR<sup>Low</sup> lung**  
 14 **tumors from the NCI-MD cohort (Attached as excel spreadsheet).**

15  
 16 **Supplemental Table 3. Clinicodemographic characteristics of the TIGERLC-**  
 17 **Intrahepatic Cholangiocarcinoma cohort.**

|               |                  | All (n=91)  | CRLow<br>n=33 (%) | CRHigh<br>n=58 (%) |
|---------------|------------------|-------------|-------------------|--------------------|
| <b>Age</b>    | <i>mean ± sd</i> | 59.7 ± 8.62 | 58.1 ± 8.81       | 60.6 ± 8.46        |
| <b>Gender</b> | <i>Male</i>      | 54          | 13 (39.4%)        | 41 (70.6%)         |
|               | <i>Female</i>    | 30          | 13 (39.4%)        | 17 (29.3%)         |
|               | <i>Unknown</i>   | 7           | 7 (21.2%)         | 0 (0%)             |

18  
 19 **Supplemental Table 4. Clinicodemographic characteristics of the**  
 20 **TIGERLC-Hepatocellular Carcinoma cohort.**

|               |                  | All (n=58)  | CRLow<br>n=42 (%) | CRHigh<br>n=16 (%) |
|---------------|------------------|-------------|-------------------|--------------------|
| <b>Age</b>    | <i>mean ± sd</i> | 54.9 ± 10.5 | 54.6 ± 9.96       | 55.5 ± 12.2        |
| <b>Gender</b> | <i>Male</i>      | 46          | 33 (76.74%)       | 13 (81.2%)         |
|               | <i>Female</i>    | 12          | 9 (20.93%)        | 3 (18.7%)          |

21  
 22 **Supplemental Table 5. Association of creatine riboside levels with**  
 23 **driver mutations in cancer cell lines.**

| Driver Mutations      | All Cancer Cell Lines p-value | NSCLC Cell Lines pvalue |
|-----------------------|-------------------------------|-------------------------|
| <i>EGFR-KRAS axis</i> | 0.22                          | 1                       |
| <i>TP53</i>           | 0.16                          | 0.2                     |
| <i>PI3K-mTOR</i>      | 0.073                         | 0.28                    |
| <i>CDKN2A</i>         | 0.095                         | 0.076                   |
| <i>ALK Fusion</i>     | 0.48                          | 0.46                    |
| <i>CTNNB1</i>         | 1                             | 1                       |
| <i>ROS1 Fusion</i>    | 1                             | 1                       |
| <i>TERT</i>           | 1                             | 1                       |

## 25 **Supplemental Methods**

### 26 ***Cell Line Sample Preparation for Metabolomics***

27 Culture media was collected and diluted 1:4 with ice-cold extraction buffer  
28 (acetonitrile/H<sub>2</sub>O/methanol (65:30:5, v/v/v)) containing 3 $\mu$ M DL-2-aminopimelic  
29 acid (Sigma) as an internal standard. Cells were washed in PBS and scraped  
30 in extraction buffer (acetonitrile/H<sub>2</sub>O/methanol (65:30:5, v/v/v)). Cell number  
31 was recorded in parallel. All samples were centrifuged (21000g, 15min) and  
32 supernatants were sonicated (2min, Bioruptor, Cosmo Bio), freeze-thawed in  
33 liquid nitrogen and filtered (Ostro Protein Precipitation & Phospholipid Removal  
34 Plate, Waters).

### 35 ***Tissue Sample Preparation for Metabolomics***

36 Frozen lung tissues (50-100mg) were weighed then milled (cryomill, -196°C).  
37 Cold extraction buffer (acetonitrile/H<sub>2</sub>O/methanol (65:30:5, v/v/v)) containing  
38 3 $\mu$ M DL-2-aminopimelic acid (Sigma)) was added directly to the milled tissues.  
39 All samples were centrifuged (21000g, 15min) and supernatants were collected  
40 for LC-MS/MS analysis.

### 41 ***LC-MS/MS Metabolomics***

42 To quantitate the metabolite levels in either cancer cells, culture media or urine,  
43 extracts were prepared as described above and analyzed by UPLCMS/MS.

44 Metabolite quantitation in extracts of cell lines, culture media, human urine and  
45 human lung tissue samples was performed by multiple reaction monitoring  
46 (MRM) using an Acquity UPLC/Xevo TQ-S micro system (Waters Corp)  
47 following an optimized quantitative protocol using a synthetic creatine riboside  
48 standard as previously described (1). Briefly, five microliters of each sample  
49 was injected to the system and chromatographic separation was achieved on

50 an Acquity UPLC BEH amide column (50 × 2.1 mm internal diameter, 1.7 μm,  
51 Waters Corp). The mobile phase was a mixture of acetonitrile/H<sub>2</sub>O (10/90, v/v,  
52 buffer A) and acetonitrile/H<sub>2</sub>O (90/10, v/v, buffer B); pH was adjusted at 9.0 for  
53 both buffer A and B using ammonium acetate and ammonium hydroxide.  
54 Gradients were run starting from 99% buffer B to 60% buffer B from 0–6 min;  
55 60% buffer B to 20% buffer B from 6–8 min; 20% buffer B to 99% buffer B from  
56 8–10 min; and 99% buffer B was held for 2 min to re-equilibrate the column.  
57 The column temperature was maintained at 40°C and the flow rate was 0.4  
58 ml/min. For measurement of urea cycle intermediates the mobile phase was a  
59 mixture of 50mM formic acid in acetonitrile (Buffer A) and 50mM formic acid in  
60 water (Buffer B) at pH 3 with separation achieved on an Acquity UPLC BEH  
61 amide column (50 × 2.1 mm internal diameter, 1.7 μm, Waters Corp).

62 Mass spectrometry data were acquired in the positive electrospray ionization  
63 mode. The dwell time was approximately 4 ms per MRM transition, and  
64 approximately 10–12 data points were acquired for each detected metabolite.  
65 Signal intensities were extracted and processed using TargetLynx software  
66 (Waters Corp). Areas under the peak for each metabolite MRM transition were  
67 extracted and normalized to those for the internal standard. Metabolite  
68 concentrations in the samples were calculated using calibration curves  
69 generated from analytical standard solutions, and then intracellular metabolite  
70 concentrations were normalized by cell number.

71 Creatine riboside levels were stratified as high and low by the median for breast  
72 cancer samples, lung tissue samples and pancreatic cancer samples, or by the  
73 75<sup>th</sup> percentile of population control (i.e. cancer-free individuals) levels for urine

74 samples for lung and liver cancer cases. For breast and pancreatic cancer  
75 samples, which contained only samples from patients with cancer, the creatine  
76 riboside levels were stratified by the median. For cell lines, classification of  
77 creatine riboside levels as high or low was defined using the median value of  
78 the panel of cell lines tested. To test the association of driver mutations with  
79 creatine riboside levels in cell lines, mutation data were obtained for each cell  
80 line from the Cancer Cell Line Encyclopaedia and a chi square test was  
81 performed to test for the association of creatine riboside with driver mutations.

82

### 83 ***Gas Chromatography Coupled Mass Spectrometry Detection of Ribose***

84 Quantitative detection of ribose, glucose and their heavy-labeled forms was  
85 performed using gas chromatography coupled mass spectrometry (GC-MS).

86 For this analysis, A549 and H460 cell extracts were prepared as follows. Cell  
87 pellets were resuspended in 0.3 ml 70% acetonitrile:water (70:30 v/v)  
88 containing 20 µl of DL-norleucine (Internal standard, 10µM), followed by  
89 homogenization using a Precellys homogenizer (Bertin Instruments, Montigny-  
90 le-Bretonneux, France), utilizing 1.0 mm zirconia/silica beads for 30 sec at 6500  
91 rpm. The samples were then centrifuged at 20,000g for 15 min at 4°C and 250  
92 µl of supernatant was taken and dried in a SpeedVac concentrator at room  
93 temperature. Cell media samples were prepared as follows: To 0.15 ml of  
94 conditioned cell culture media, 0.15 ml of acetonitrile containing with internal  
95 standard DL-norleucine (10µM) was added. The samples were centrifuged at  
96 20,000g for 10 min at 4°C and 0.250 mL supernatant transferred to 2 ml vials.  
97 The dried residue from cell pellets or media samples were derivatized by adding

98 50  $\mu$ l BSTFA and sonicated for 30 min at room temperature. The samples were  
99 diluted with 50  $\mu$ l acetonitrile, briefly vortexed for 10 s and 1.00  $\mu$ l was injected  
100 into the GC-MS using an autosampler.

101 D-ribose, U-<sup>13</sup>C<sub>5</sub> D-ribose, D-glucose, and U-<sup>13</sup>C<sub>6</sub> D-glucose chromatography  
102 were carried out on a capillary column (30 m  $\times$  0.250 mm, 0.25  $\mu$ m; Agilent  
103 Technologies, Foster City, CA) with 17.0 min run time. All analytes were  
104 separated at 9.0 min retention time, m/z 217 (qualifier ions m/z 204, 191) TMS  
105 derivatives for D-ribose, at 9.0 min retention time, m/z 220 (qualifier ions m/z  
106 206, 192) TMS derivatives for U-<sup>13</sup>C<sub>5</sub> D-ribose, at 10.7 min retention time, m/z  
107 204 (qualifier ions m/z 217, 191) TMS derivatives for D-glucose, at 10.7 min  
108 retention time, m/z 206 (qualifier ions m/z 220, 192) TMS derivatives for U<sup>13</sup>C<sub>6</sub>  
109 D-Glucose and at 11.4 min retention time, m/z 200 (qualifier ions m/z 274, 302)  
110 TMS derivatives for internal standard DL-Norleucine on SIM mode of 40–500  
111 m/z. Analyses were performed with an Agilent 6890N gas chromatograph  
112 coupled to an Agilent 5973 mass-selective detector (MSD) with the following  
113 chromatographic conditions: Initial temperature 100°C for 2 min, increasing to  
114 200°C at 10°C/min for 17 min. The front inlet temperature was 230°C operating  
115 with a split ratio of 1:25. MSD ion source and interface temperature were 230°C.  
116 The MSD operated in EI mode at 70 eV. Carrier gas was He (1.0 ml/min).  
117 GCMS data were acquired and processed using Agilent MassHunter  
118 WorkStation software. Standard solutions were used for precise quantitative  
119 determination of metabolite concentration. Stock solutions of calibration  
120 standards and internal standards (D-ribose, U-<sup>13</sup>C<sub>5</sub> D-ribose, Dglucose, and U-  
121 <sup>13</sup>C<sub>6</sub> D-glucose, DL-norleucine (5.0 mM in water) were prepared in



122 acetonitrile:water (50:50 v/v) for a final standard curve concentration range of  
123 0.02-10 $\mu$ M, and internal standard concentration of 10 $\mu$ M.

124

### 125 ***RNA Sequencing***

126 Lung tumor and adjacent non-tumor tissue samples and urine samples were  
127 collected as part of the NCI- University of Maryland Study according to  
128 protocols approved by the institutional review board. Total RNA was extracted  
129 from the tissues as previously described (2), and libraries suitable for paired-  
130 ended sequencing were generated using Illumina's TruSeq Stranded Total  
131 RNA Library Prep Kit. RNA samples were pooled and sequenced on a HiSeq.  
132 The sequencing quality of each sample was assessed using FastQC (3). Read-  
133 and alignment-level quality were assessed using FastQ Screen (4), Preseq (5)  
134 Picard tools, RSeQC (6) and QualiMap (7). Reads were trimmed for adapter  
135 sequences and low-quality bases using Cutadapt (8) prior to alignment against  
136 the human reference genome, hg19, using STAR (9) in two-pass mode with  
137 GENCODE v19 annotation (10) Gene expression levels were quantified using  
138 RSEM (11) Batch correction was performed using the Combat algorithm from  
139 the SVA package (12).

140 For analysis of TCGA data, RNAseq and clinicodemographic data of lung  
141 adenocarcinoma, lung squamous non-small cell lung cancer and hepatocellular  
142 carcinoma were downloaded from [https://gdc.cancer.gov/about-](https://gdc.cancer.gov/about-data/publications/pancanatlas)  
143 [data/publications/pancanatlas](https://gdc.cancer.gov/about-data/publications/pancanatlas) using survival information from (13).  
144 Corresponding mutational information was downloaded from GDAC FireHose  
145 (14–16). Tumors were assigned as Creatine Riboside High or Low depending  
146 on their transcriptional profile for the CR signatures identified in the NCI-MD

147 cohorts. Pentose Phosphate Pathway activity score was assigned to each  
148 sample using GSVA and the signature of G6PD, TALDO1, PRPS1 and RPE).  
149 For lung tumors, a mitochondrial urea cycle dysfunction score was assigned as  
150 CPS1 + NAGS expression. For hepatocellular carcinoma, the mitochondrial  
151 urea cycle activity score was assigned using GSVA for the mitochondrial urea  
152 cycle signature of CPS1, OTC and NAGS. Tumors were tertile stratified for  
153 each measure as low, medium and high. To ensure consistency with the CR  
154 signatures identified in CR-High and CR-Low tumors of the NCI-MD lung and  
155 liver cohorts, tumors assigned as CR-Low-Like tumors were high in the  
156 mitochondrial urea cycle score and low in the pentose phosphate pathway  
157 score. Tumors assigned as CR-High-Like tumors were low in the mitochondrial  
158 urea cycle score and high in the pentose phosphate pathway score. This  
159 stratification was carried through subsequent analyses in the same manner as  
160 the NCI-MD cohort analyses, as described in detail below.

161

162 Association with survival was assessed by log-rank test as well as cox  
163 proportional hazards models implemented using the survival and survminer  
164 packages in R. Differential gene expression analysis was performed using  
165 EdgeR (17) and Limma (18). Enriched pathways were identified using Gene  
166 Set Enrichment Analysis (GSEA) against the KEGG subset of the C2 MSigDb  
167 collection (19). Cell type deconvolution was performed using Cibersortx and the  
168 LM22 gene signature set of hematopoietic cell subsets in bulk tissues (20, 21).

169 ***Whole Exome Sequencing***

170 Total DNA was extracted from lung tumor tissue from the NCI-MD cohort as  
171 described previously (2). Samples were pooled and sequenced on NovaSeq  
172 using Illumina Agilent SureSelect Human All Exon V7 in paired end-sequencing  
173 mode. The samples were trimmed, mapped and variants were called in the  
174 samples using the Dragen pipeline. Raw sequencing depth coverage over the  
175 target region was between 622x and 1,629x and mapped sequencing depth  
176 coverage over target (after alignment and marking duplicates) was between  
177 411x to 1,070x. More than 98% of the target region had coverage greater than  
178 30x. The somatic variants were called using tumor only analysis with the panel  
179 of normal. SNPs and INDELS were called using the GATK haplotype caller  
180 which is masked for off-target calls and filtered using  $QD > 2.0$ ,  $FS > 60$  for SNPs  
181 and  $QD < 2.0$ ,  $FS > 200$  for INDELS.

182

183 ***Stable Isotope Tracing***

184 Metabolic pathway activity in creatine riboside low and -high cancer cells was  
185 examined by tracing stable heavy carbons from glucose through intracellular  
186 metabolite pools. Cells were cultured in phenol-red-free RPMI media containing  
187 10% dialyzed serum during labeling experiments. Media was dialyzed as  
188 previously described (22). Cells were washed quickly using 0.9% NaCl and  
189 harvested in 80% aqueous methanol containing 500nM 15N, 13C- amino acid  
190 mix (Cambridge Isotopes Laboratories MSK-A2-1.2). Samples were dried  
191 (speedvac) before being resuspended in 100 ul LC/MS grade water and

192 analyzed by LC/MS as described (23). Metabolite profiling and stable isotope  
193 tracing LC/MS analyses were conducted on a QExactive bench top orbitrap  
194 mass spectrometer equipped with an Ion Max source and a HESI II probe,  
195 which was coupled to a Dionex UltiMate 3000 HPLC system (Thermo Fisher  
196 Scientific, San Jose, CA). External mass calibration was performed using the  
197 standard calibration mixture every 7 days. Dried polar metabolite extracts were  
198 reconstituted in 100  $\mu$ L water and 2  $\mu$ L were injected onto a SeQuant® ZIC®-  
199 pHILIC 150 x 2.1 mm analytical column equipped with a 2.1 x 20 mm guard  
200 column (both 5 mm particle size; EMD Millipore). Buffer A was 20 mM  
201 ammonium carbonate, 0.1% ammonium hydroxide; Buffer B was acetonitrile.  
202 The column oven and autosampler tray were held at 25°C and 4°C,  
203 respectively. The chromatographic gradient was run at a flow rate of 0.150  
204 mL/min as follows: 0-20 min: linear gradient from 80-20% B; 20-20.5 min: linear  
205 gradient form 20-80% B; 20.5-28 min: hold at 80% B. The mass spectrometer  
206 was operated in full-scan, polarity-switching mode, with the spray voltage set  
207 to 3.0 kV, the heated capillary held at 275°C, and the HESI probe held at 350°C.  
208 The sheath gas flow was set to 40 units, the auxiliary gas flow was set to 15  
209 units, and the sweep gas flow was set to 1 unit. MS data acquisition was  
210 performed in a range of  $m/z$  = 50-750, with the resolution set at 70,000, the  
211 AGC target at  $1 \times 10^6$ , and the maximum injection time at 20 msec. Relative  
212 quantitation of polar metabolites was performed with XCalibur QuanBrowser  
213 2.2 (Thermo Fisher Scientific) using a 5 ppm mass tolerance and referencing  
214 an in-house library of chemical standards. For stable isotope tracing analyses,  
215 data were corrected for natural abundance using an in-house script, as  
216 discussed in Buescher et al. (2015).

217

218 ***Tissue Preparation for Imaging Mass Spectrometry***

219 Tumor and adjacent non-tumor tissue samples were prepared for *in situ* spatial  
220 measurement of creatine riboside levels using imaging mass spectrometry.  
221 Small blocks of fresh frozen human lung tumor tissues were shipped on dry ice  
222 and kept at -80°C prior to use. Tumor/non-tumor tissue pairs from each patient  
223 were analyzed. Tissues were placed in a -20°C cryostat (CM 1900, Leica  
224 Biosystems, Buffalo Grove, IL) to equilibrate prior to sectioning. Tissues were  
225 cut on the cryostat into 12 µm thick sections for imaging mass spectrometry  
226 and H&E staining. H&E stained sections were blinded and annotated as tumor  
227 and non-tumor regions by a pathologist (J. Beck) for cross-reference to the  
228 imaging mass spectrometry signal. Additionally, up to twelve additional sections  
229 were obtained at 10 µm for subsequent specialized staining and  
230 immunohistochemistry. The tissue sections designated for imaging mass  
231 spectrometry were thaw-mounted onto indium-tin oxide coated glass slides.  
232 The tissue sections were left to dry for at least 15 min in a desktop vacuum  
233 desiccator prior to matrix application. 2,5Dihydroxybenzoic acid (DHB, 40  
234 mg/ml, 70% methanol with 0.1% trifluoroacetic acid) was used as the matrix  
235 and was applied to the tissue sections using an automated sprayer (TM  
236 Sprayer, HTX Technologies, Chapel Hill, NC). Eight passes were applied at  
237 85°C in a criss-cross pattern, with a 1300 mm/min stage velocity, 2 mm track  
238 spacing and 0.15 ml/min flow rate.

239

240 ***Imaging Mass Spectrometry***

241 The in situ spatial distribution of creatine riboside levels within tumor and  
242 adjacent non-tumor tissue was measured by imaging mass spectrometry.  
243 Tissue samples prepared as described above were analyzed in positive ion  
244 mode with a linear ion trap mass spectrometer equipped with a MALDI source  
245 and a nitrogen laser (LTQ XL, Thermo Scientific, Waltham, MA). A targeted  
246 MS/MS method was optimized for creatine riboside using a standard  
247 compound. Pseudo-selected reaction monitoring mode was used for imaging  
248 by isolating the precursor ion at m/z 264 with a 1 Da window, fragmenting it,  
249 and acquiring a full product ion mass spectrum at each pixel. Reconstructed  
250 ion images were generated in ImageQuest software (Thermo Scientific,  
251 Waltham, MA) by plotting the intensity of the main diagnostic fragment ion at  
252 m/z 132 as a function of location across the tissue surface. After imaging, the  
253 matrix was removed and the tissue section that had been imaged was stained  
254 with hematoxylin and eosin (H&E) for better image registration with tissue  
255 morphology. Images were acquired at 70  $\mu\text{m}$  spatial resolution by using a  
256 pinwheel filter in front of the laser beam to reduce its diameter.

257

258 ***OPAL Multiplex Immunofluorescence Staining and Imaging***

259 Slides were removed from -80C, brought to room temperature for 30 minutes, and  
260 fixed in a formaldehyde glutaraldehyde fixative for 30 minutes. After rinsing in T-  
261 TBS buffer, antigen retrieval was performed with Target Retrieval Solution  
262 (Agilent #S2367) at 100C for 15 minutes in a Biocare Decloaking Chamber.  
263 Slides were cooled for 15 minutes, rinsed with distilled water and placed in T-TBS  
264 buffer. Slides for autofluorescence controls were set aside during the following

265 antibody stains but were subjected to each round of heat treatment. Sections for  
266 multiplex staining were circled with pap pen, blocked with 2.5% normal horse  
267 serum (NHS) for 20 minutes, followed by incubation with Ki67 (Cell Signaling  
268 Technology #9027, diluted 1:25) for 30 minutes. Slides were rinsed in T-TBS,  
269 incubated with the ImmPRESS a/Rabbit-HRP reagent, rinsed, followed by OPAL  
270 Polaris 480. Antibody/HRP stripping was performed again as described above.  
271 The next round of staining was performed with NHS block, PD-1 (Cell Signaling  
272 Technology #43248, diluted 1:100) overnight at 4C, ImmPRESS Reagent Horse  
273 anti-Mouse IgG-HRP (Vector Laboratories), and OPAL 570. Antibody/HRP  
274 stripping was again performed, followed by a subsequent round of staining with  
275 NHS block, CD68 (Agilent #M0876, diluted 1:50) for 30 minutes, ImmPRESS  
276 a/Mouse-HRP reagent, and OPAL 620. Following the antibody/HRP stripping,  
277 the final round of staining with NHS block, CD8 (abcam #ab101500, diluted 1:50)  
278 was performed for 30 minutes, ImmPRESS a/Rabbit-HRP reagent, OPAL  
279 TSADIG, antibody stripping, OPAL Polaris 780, and spectral DAPI.  
280 Multiplexstained and autofluorescence control slides were coverslipped with  
281 ProLong Gold Antifade Mountant (Invitrogen). Slides were kept flat in a slide  
282 folder overnight at room temperature then transferred to -20C until imaging.  
283 Slides were imaged on a Vectra Polaris. Multiplexed images were unmixed using  
284 InForm software. Quantitative analysis of cell types was performed in QuPath  
285 (v2.4). Tissue masks were generated by pixel detection. Cell detection was  
286 performed on the DAPI channel using StarDist. Feature detection algorithms  
287 were manually trained on composite images from 6-7 tissues and applied equally  
288 to all images. Regions of sections that were folded were excluded from the final  
289 analysis. Pathological annotations performed on the MALDI imaging mass

290 spectrometry sections were applied to the multispectral images to correlate  
291 creatine riboside signal with immunofluorescence markers. The number of  
292 positive cells were normalized to the total number of cell detections in that region  
293 of interest.





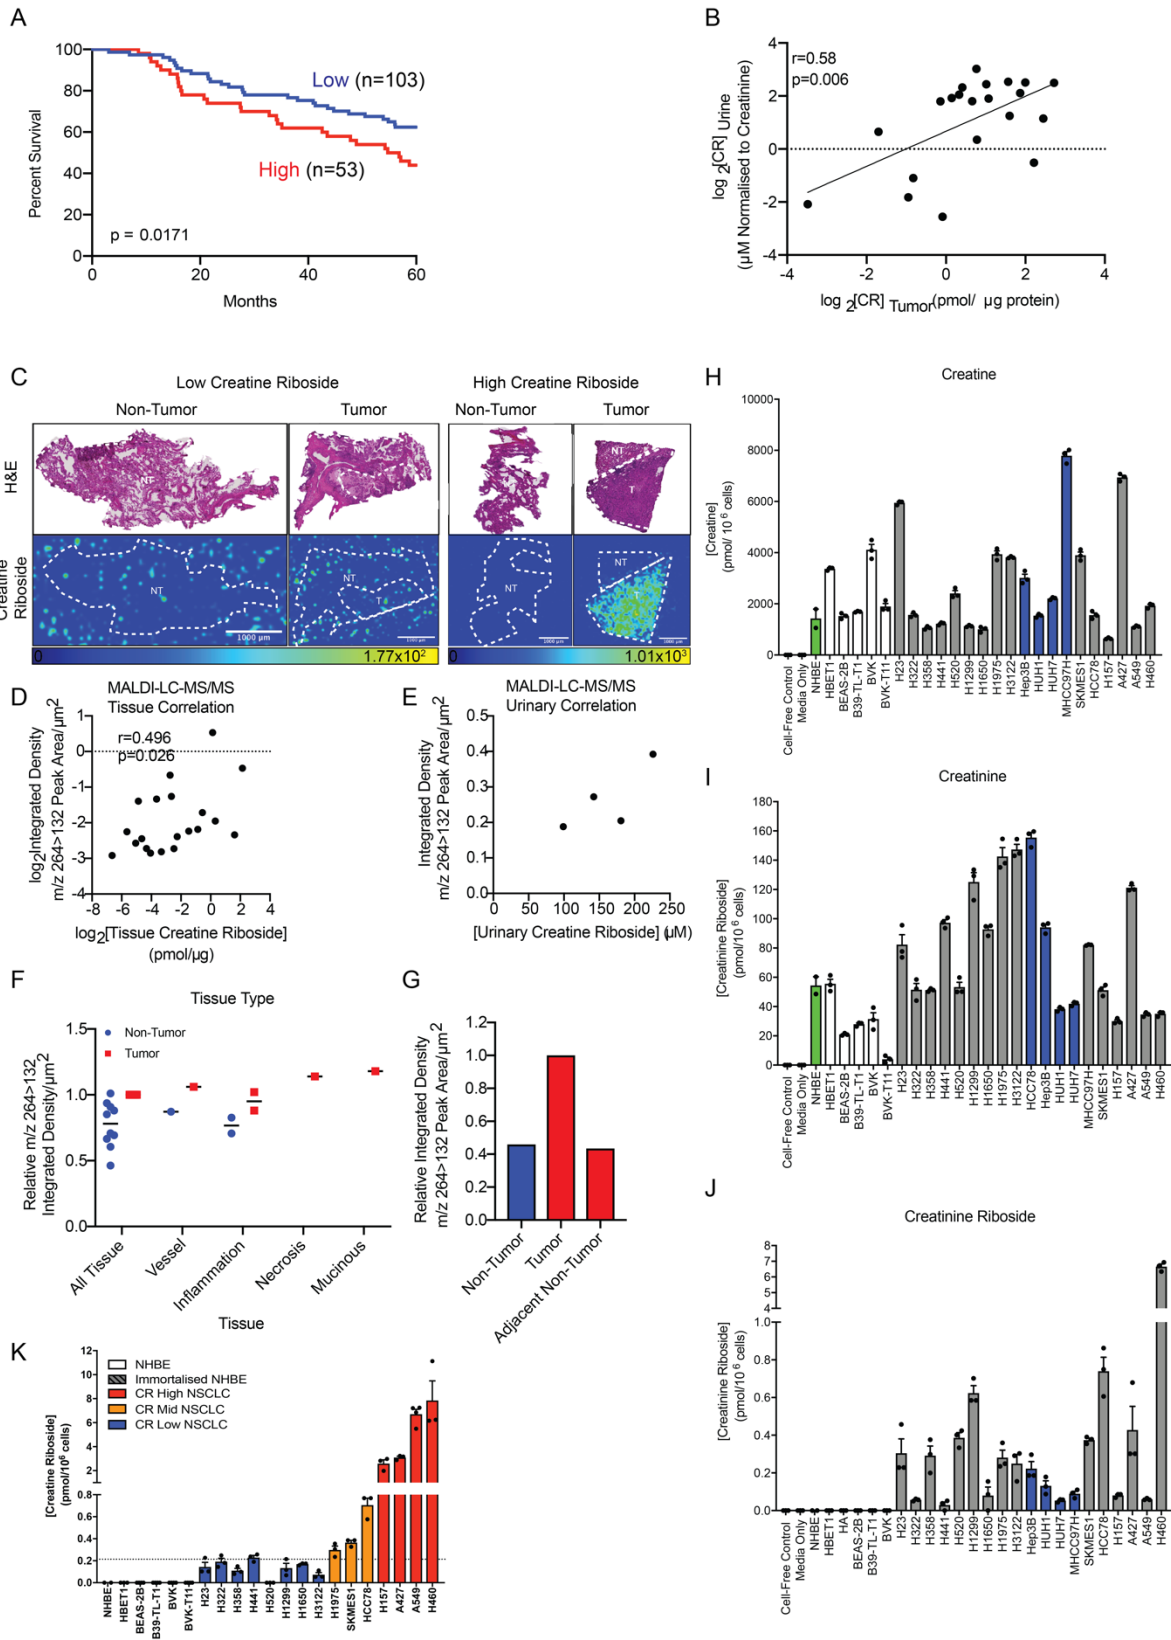

295

296 **Supplemental Figure 1. A)** Survival analysis of urinary CR levels in NSCLC patients

297 as measured using the highly quantitative  $^{13}\text{C}$ -CR assay (CR Low = lowest 66%ile

298 (n=103); CR High = highest 33%ile (n=53); log rank test p=0.0171). **B)** Correlation of  
299 urinary CR with tumor tissue CR levels. Spearman's correlation R=0.6, p=0.006, n=21  
300 NSCLC tumor tissues. **C)** MALDI MS image of tumor and non-tumor tissue presenting  
301 the same data as Figure 1C but with the CR signal of each tumor and non-tumor pair  
302 presented on individual scales to illustrate the range within individual patients. **D and**  
303 **E)** Correlation of the MALDI-IMS CR signal abundance with the tissue CR  
304 concentration (Spearman's correlation r=0.496, p = 0.026) (**D**) and the urinary CR  
305 concentration (Spearman's correlation r=0.773) (**E**) as measured by LCMS. **F)** CR  
306 abundance within different regions of the tissues as measured by MALDI-imaging  
307 mass spectrometry. Blue: non-tumor; Red: tumor. **G)** CR abundance in a tumor tissue  
308 section that contains non-tumor tissue surrounded by non-tumor tissue ("Adjacent  
309 Non-tumor") compared with noninvolved non-tumor tissue ("Non-tumor"). **H, I and J)**  
310 Intracellular concentrations of creatine (**H**), creatinine (**I**) and creatinine riboside (**J**) in  
311 the panel of cell lines tested. NHBE: normal bronchial epithelial cells (green);  
312 immortalized NHBE: immortalized normal human bronchial epithelial cells (white);  
313 NSCLC: NSCLC cells (grey); HCC: hepatocellular carcinoma (blue). Mean  $\pm$  SEM of  
314 n=3-4 independent experiments. Metabolite concentrations were measured by LC-  
315 MS/MS and normalized to cell number. **K)** Stratification of NSCLC cell lines as low,  
316 mid and high endogenous CR levels. Dotted line indicates the median creatine riboside  
317 concentration. Mean  $\pm$  SEM of n=3-4 independent experiments.

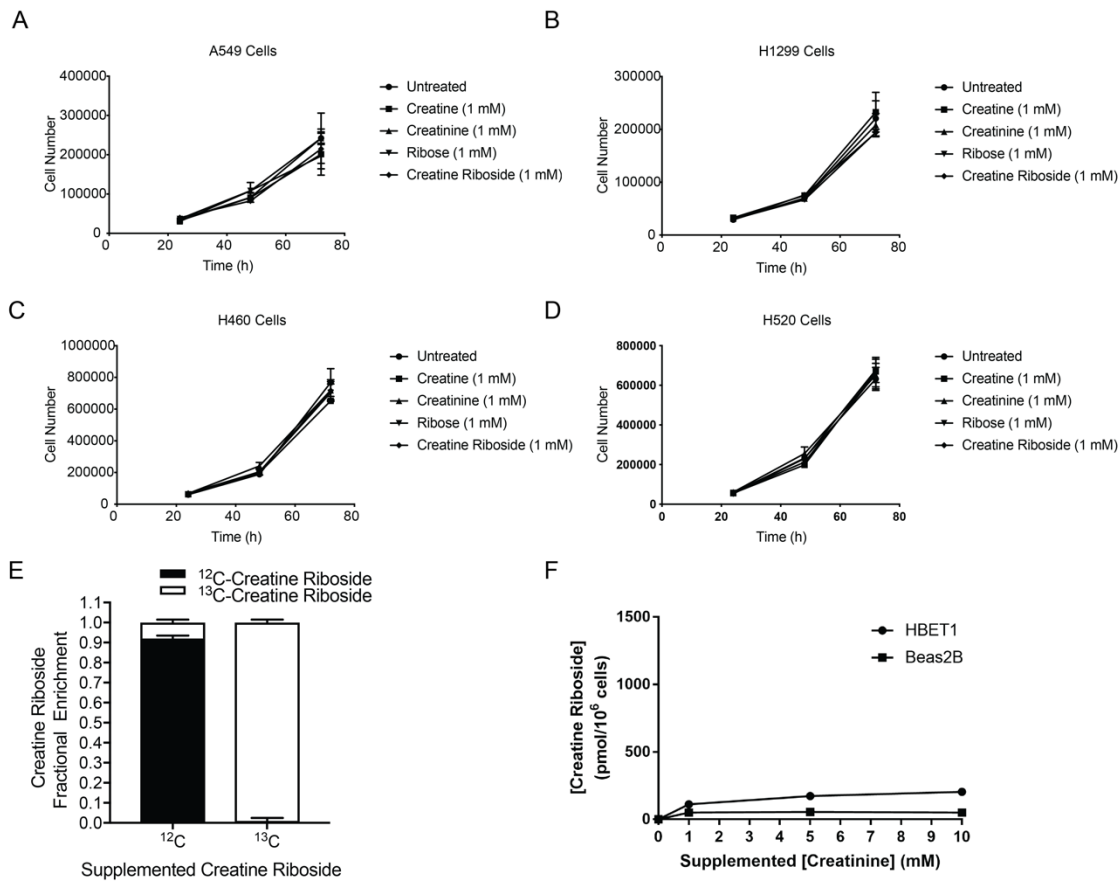

318

319 **Supplemental Figure 2. A-D)** Proliferation rate of CR<sup>High</sup> (A549 (A); H460 (C)) and

320 CR<sup>Low</sup> (H1299 (B); H520 (D)) cell lines when cultured in normal media (untreated) or

321 normal media supplemented with 1mM creatine, creatinine, ribose or CR. 3

322 independent experiments. No significant difference in proliferation. E) Fractional

323 enrichment of the intracellular pool of CR in H460 cells cultured in media supplemented

324 with  $^{12}\text{C}$ -CR or  $^{13}\text{C}$ -CR. F) CR levels in immortalized bronchial epithelial cells (HBET1

325 (circles) and Beas2B (squares)) supplemented with exogenous creatinine.

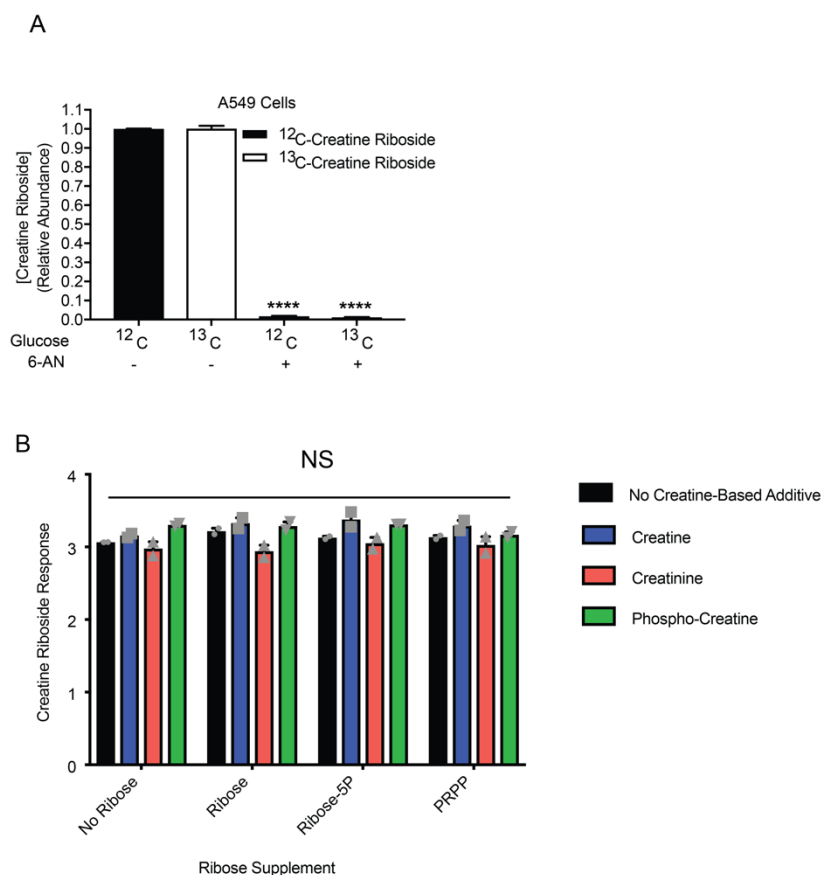

326

327 **Supplemental Figure 3. A)** Fractional enrichment of CR labeling from <sup>13</sup>C-Glucose

328 over time in H460 cells treated with (black line) and without (blue line) the PGDH

329 inhibitor 6-aminonicotinamide (6-AN). Mean±SEM of n=3 independent experiments,

330 \*p<0.05, Two-way ANOVA with Holm-Sidak multiple comparison correction. **B)**

331 Relative CR concentrations in urine samples spiked with ribose metabolites and

332 creatine metabolites prior to extraction. Mean ± SEM of n=2 independent experiments,

333 Two-way ANOVA with Holm-Sidak multiple comparison correction, no significant

334 difference compared with unsupplemented urine.

335

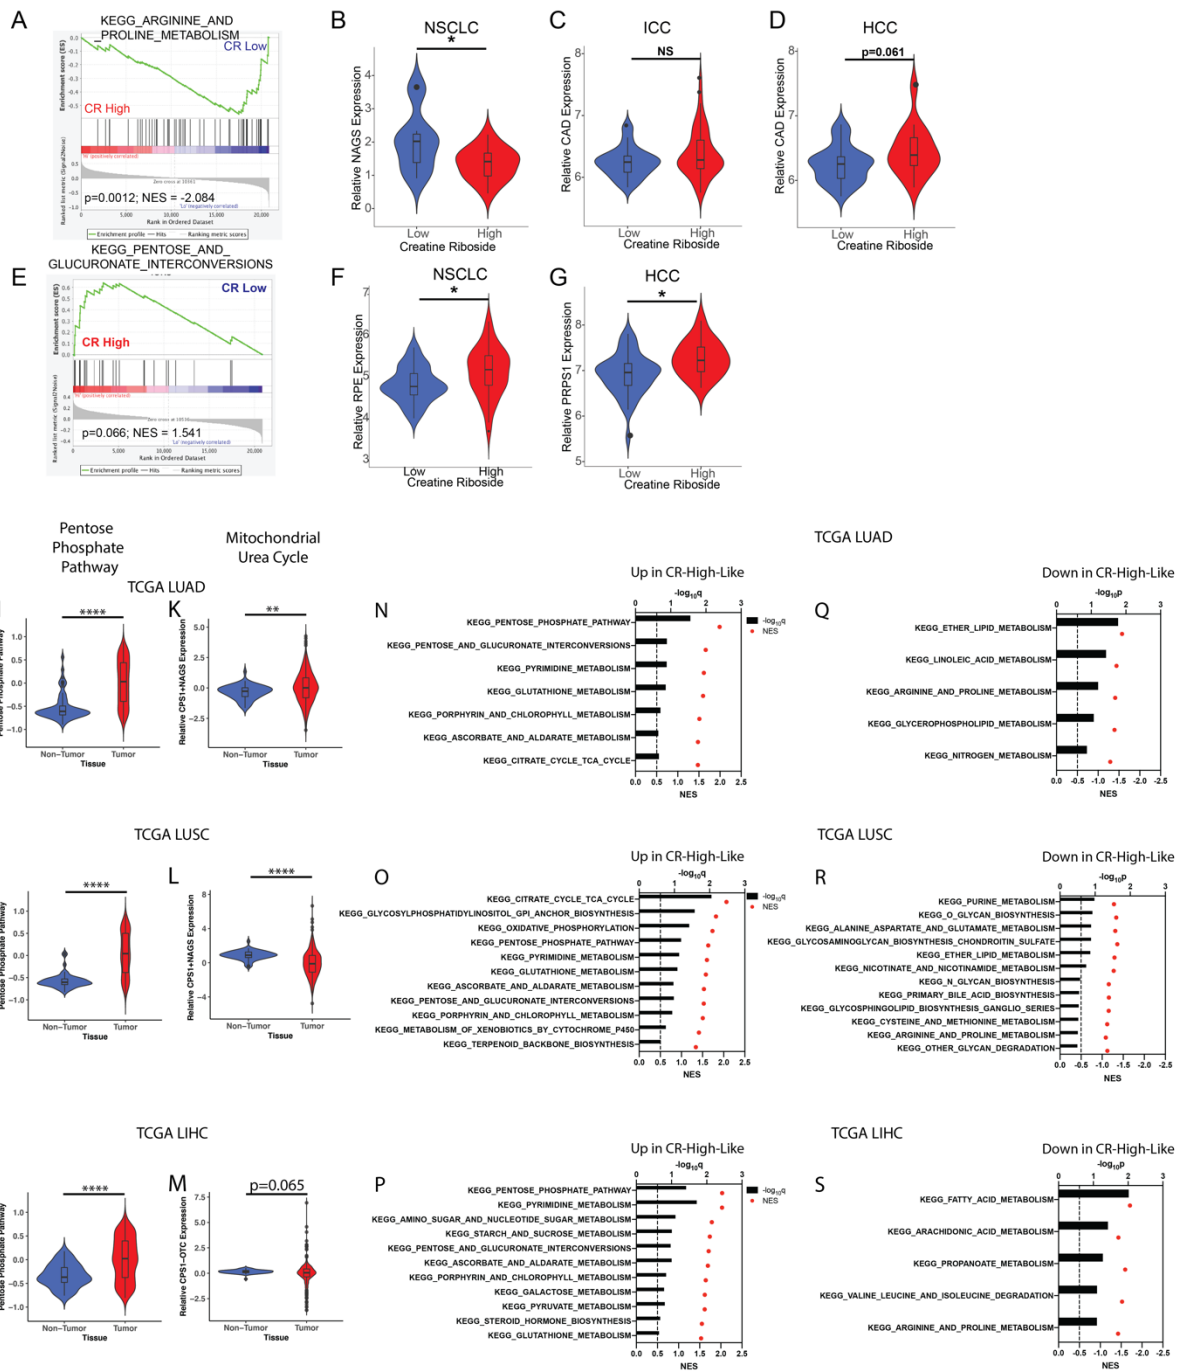

336

337 **Supplemental Figure 4. A-D)** Gene Set Enrichment Plot of arginine and proline  
 338 metabolism in NSCLC **(A)** with expression of core enriched genes in NSCLC **(B)**,  
 339 intrahepatic cholangiocarcinoma **(C)** and hepatocellular carcinoma **(D)**. **E-G)** Gene  
 340 Set Enrichment Plot of the pentose and glucuronate interconversion pathway in  
 341 NSCLC **(E)** and expression of core enriched genes in NSCLC **(F)** and hepatocellular  
 342 carcinoma **(G)**. **H-J)** Gene Set variation Analysis of pentose phosphate pathway

343 expression in the TCGA cohorts of lung adenocarcinoma **(H)** , squamous non-small  
344 cell lung cancer **(I)** and hepatocellular carcinoma **(J)** in tumor compared with non-  
345 tumor tissue. \*\*\*\* $p < 0.001$ , Mann-Whitney U-test. **K-M)** Mitochondrial urea cycle  
346 dysfunction in the TCGA cohorts of lung adenocarcinoma **(K;** as measured by  
347 CPS1+NAGS expression), squamous non-small cell lung cancer **(L;** as measured by  
348 CPS1+NAGS expression) and hepatocellular carcinoma **(M;** as measured by CPS1-  
349 OTC expression) in tumor compared with non-tumor tissue. \*\*  $p < 0.01$ , \*\*\*\* $p < 0.001$ ,  
350 Mann-Whitney U-test. **N-P)** Gene Set Variation Analysis of top KEGG metabolic  
351 pathways enriched in CR<sup>High</sup>-Like tumors in the TCGA cohorts of lung  
352 adenocarcinoma **(N)**, squamous non-small cell lung cancer **(O)** and hepatocellular  
353 carcinoma **(P)**. Black bars:  $-\log_{10}$ (P-values adjusted for multiple comparisons); red  
354 dots: normalized enrichment score. **Q-S)** Gene Set Enrichment Analysis results of the  
355 top KEGG metabolic pathways enriched in CR<sup>High</sup>-Like tumors in the TCGA cohorts  
356 of lung adenocarcinoma **(Q)**, squamous non-small cell lung cancer **(R)** and  
357 hepatocellular carcinoma **(S)**. Black bars:  $-\log_{10}$ (P-values); red dots: normalized  
358 enrichment score.  
359

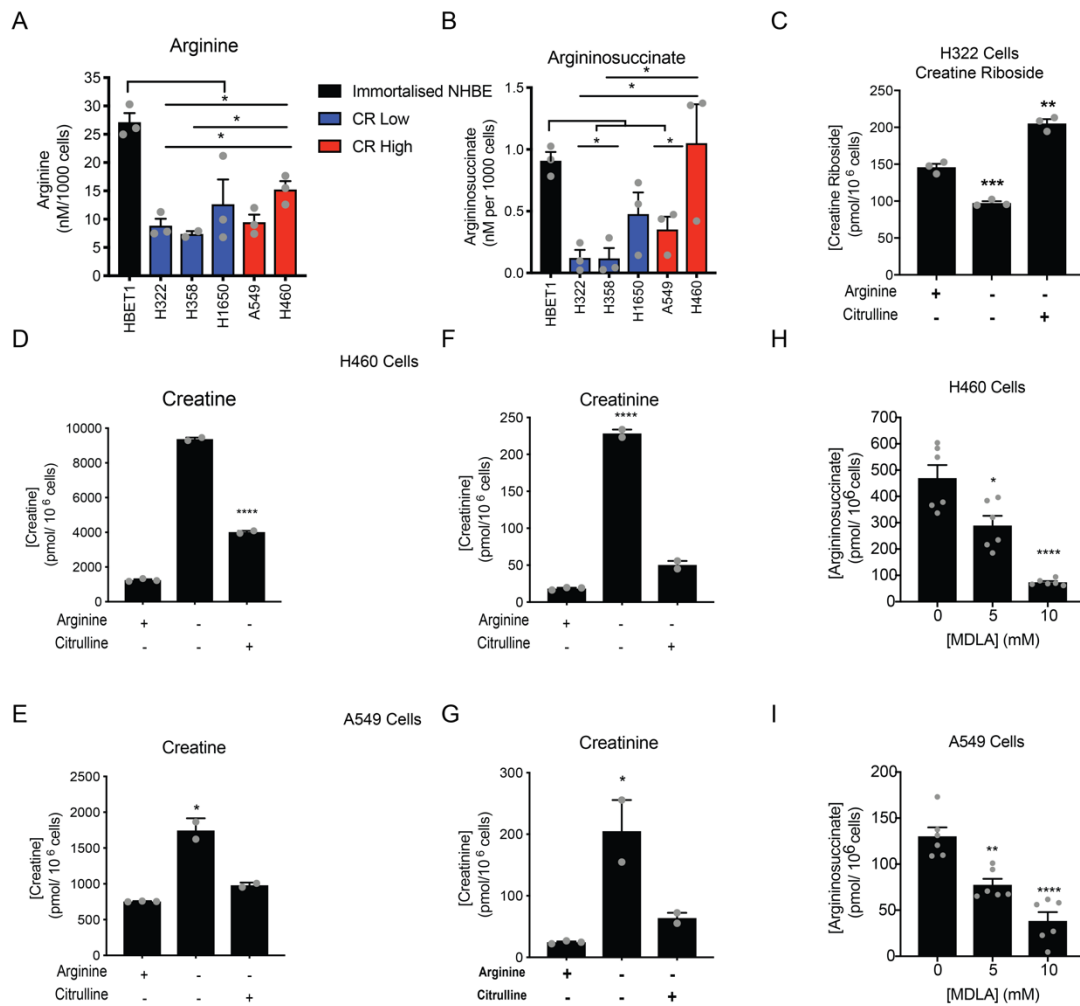

360

361 **Supplemental Figure 5. A and B** Intracellular arginine **(A)** and argininosuccinate

362 **(B)** concentrations in CR<sup>High</sup> (red) and CR<sup>Low</sup> (blue) NSCLC cell lines and

363 immortalized bronchial epithelial cells (black). Mean ± SEM of n=3 independent

364 experiments, \*p<0.05, One-way ANOVA with Dunnett's multiple comparison

365 correction. **C**) Intracellular CR levels in the CR<sup>Low</sup> (H322) NSCLC cell line cultured in

366 creatinine-enriched normal or arginine-depleted media with or without citrulline

367 supplementation. Mean ± SEM of n=3 independent experiments, \*p<0.05, One-way

368 ANOVA with Dunnett's multiple comparison correction. **D-G**) Intracellular creatine **(D,**

369 **E)** and creatinine **(F, G)** concentrations of H460 **(D, F)** and A549 **(E, G)** cells in

370 response to arginine deprivation and supplementation with citrulline. Mean ± SEM of

371 n=2 independent experiments, \*p<0.05, \*\*\*\*p<0.0001, One-way ANOVA with



372 Dunnett's multiple comparison correction. **H and I**) Intracellular argininosuccinate  
373 concentrations in H460 (**H**) and A549 (**I**) cells treated with methyl –DL-aspartate  
374 (MDLA). Mean  $\pm$  SEM of n=2 independent experiments, \*p<0.05, \*\*p<0.01,  
375 \*\*\*\*p<0.0001 relative to untreated cells, One-way ANOVA with Dunnett's multiple  
376 comparison correction.  
377

378

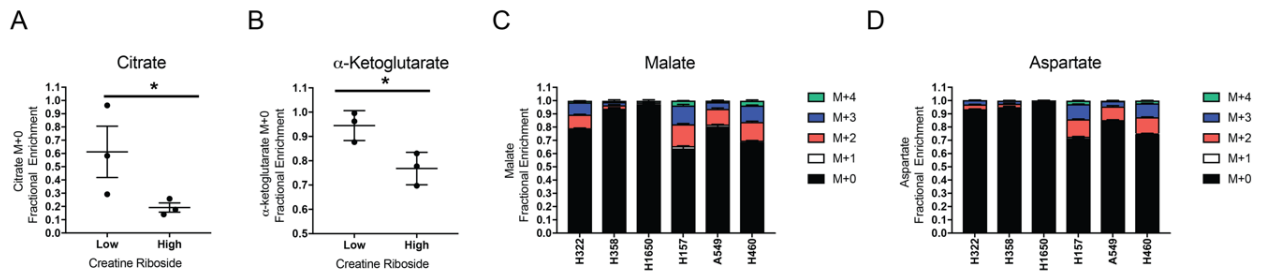

379

380

**Supplemental Figure 6. A and B)** Fractional enrichment of unlabeled tricarboxylic acid metabolites citrate (A) and alpha-ketoglutarate (B) in NSCLC cell lines with

381

CR<sup>Low</sup> and CR<sup>High</sup> levels incubated with U-<sup>13</sup>C-glucose. Mann Whitney Utest \* $p < 0.05$ .

382

CR<sup>Low</sup> and CR<sup>High</sup> levels incubated with U-<sup>13</sup>C-glucose. Mann Whitney Utest \* $p < 0.05$ .

383

**C and D)** Labeling pattern of unlabeled tricarboxylic acid metabolites malate (C) and

384

aspartate (D) in CR<sup>Low</sup> and CR<sup>High</sup> NSCLC cell lines incubated with U-<sup>13</sup>C-glucose.

385

386

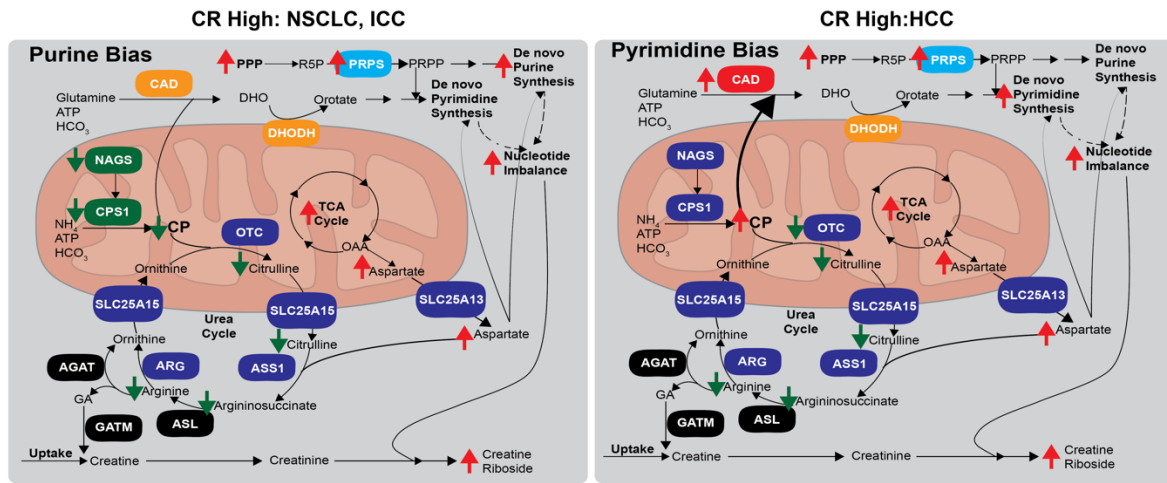

387

388 **Supplemental Figure 7.** Schematic of the metabolic phenotypes promoting CR  
389 production in tumors with a purine bias (NSCLC, ICC; left panel) and pyrimidine bias  
390 (HCC; right panel).

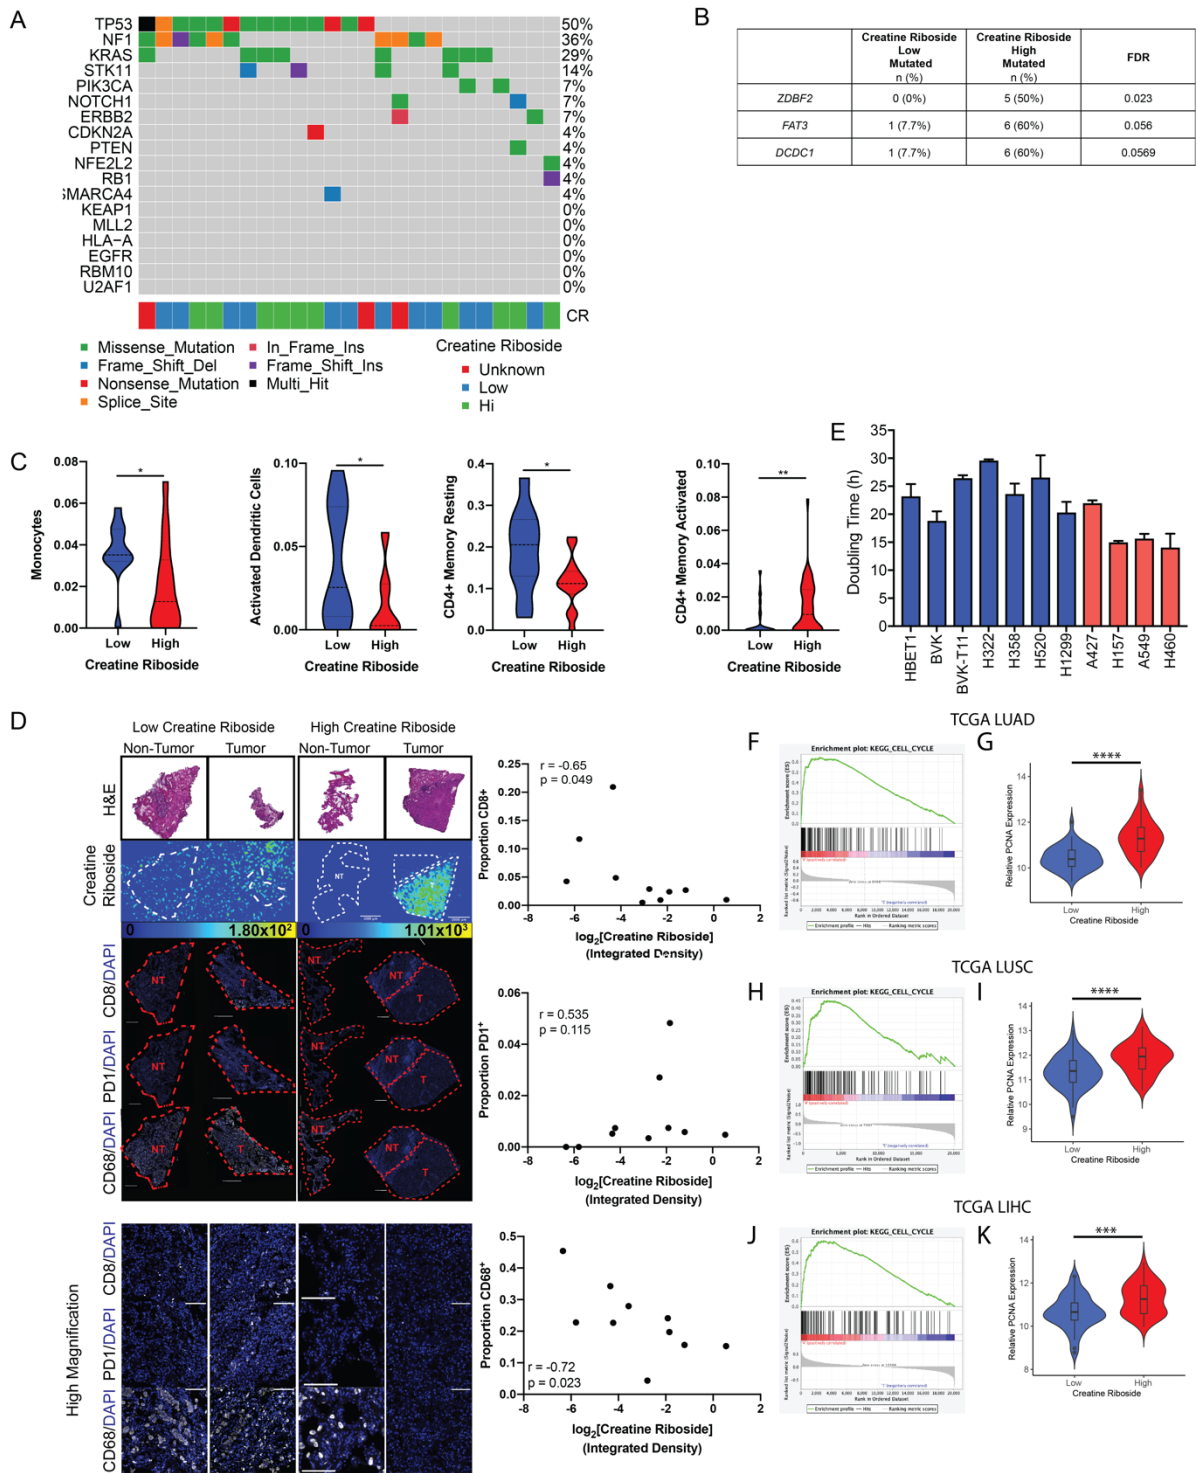

393 **Supplemental Figure 8. A)** Mutational frequencies in the NCI-MD NSCLC  
 394 cohort according to CR levels (lower panel). **B)** Top most differentially  
 395 enriched mutant genes in CR<sup>High</sup> vs CR<sup>Low</sup> NSCLC tumors. **C)** Immunological

396 differences in CR<sup>High</sup> NSCLC tumors compared with CR<sup>Low</sup> NSCLC tumors, as  
397 measured by bulk RNAseq deconvolution (Mann-Whitney U-test, \*p<0.05). **D)**  
398 Immunological differences in CR<sup>High</sup> liver tumors compared with CR<sup>Low</sup> lung tumors, as  
399 measured by multiplex immunohistochemistry, in tumor and nontumor samples for  
400 which creatine riboside levels were spatially characterized by imaging mass  
401 spectrometry (Figure 1C) (MALDI imaging mass spectrometry creatine riboside  
402 quantitation presented in upper panels). Correlation of creatine riboside level with  
403 number of CD8+, PD1+ and CD68+ cells in tumor samples only (right panel) show  
404 significant negative correlation of CD8+ (r=-0.65, p=0.049) and CD68+ cells (r=-0.72,  
405 p=0.023) with tumoral creatine riboside levels. The positive correlation between  
406 creatine riboside levels and PD1+ cells did not reach significance (r=0.535, p=0.115).  
407 Spearman's correlation. Images are representative of n=10 matched tissues (DAPI =  
408 blue, markers of interest overlaid in greyscale; Low magnification scale bar = 500  $\mu$ m;  
409 High magnification scale bar = 100  $\mu$ m). NT = non-tumor, T = tumor. **E)** Doubling time  
410 measurements for individual CR<sup>High</sup> (red) and CR<sup>Low</sup> (blue) NSCLC cell lines as  
411 measured by Trypan blue and cell counting. Corresponds to the group summary data  
412 presented in Figure 9D). Mean  $\pm$  SEM of n=2 independent experiments. **F, H and J)**  
413 Gene set enrichment analysis results of CR<sup>High</sup>-Like and CR<sup>Low</sup>-Like tumors in the  
414 TCGA cohorts of lung adenocarcinoma (TCGA LUAD, **F**), squamous non-small cell  
415 lung cancer (TCGA LUSC, **H**) and hepatocellular carcinoma (TCGA LIHC, **J**) identified  
416 that CR<sup>High</sup> tumors are significantly enriched in the expression of cell cycle genes  
417 compared with CR<sup>Low</sup> tumors. **G, I and K)** Cell proliferation marker PCNA expression  
418 in CR<sup>High</sup>-Like and CR<sup>Low</sup>-Like tumors in the TCGA cohorts of lung adenocarcinoma  
419 (TCGA LUAD, **G**), squamous non-small cell lung cancer (TCGA LUSC, **I**) and

420 hepatocellular carcinoma (TCGA LIHC, **K**). \*\*\*  $p < 0.001$ , \*\*\*\*  $p < 0.0001$ , Mann-Whitney  
421 U-test.

422 **References**

- 423 1. Patel DP et al. Improved detection and precise relative quantification of the urinary  
424 cancer metabolite biomarkers - Creatine riboside, creatinine riboside, creatine and  
425 creatinine by UPLC-ESI-MS/MS: Application to the NCI-Maryland cohort population  
426 controls and lung cancer cases. *J. Pharm. Biomed. Anal.* 2020;191:113596.
- 427 2. Chaisaingmongkol J et al. Common molecular subtypes among asian  
428 hepatocellular carcinoma and cholangiocarcinoma. *Cancer Cell* 2017;32(1):57–70.e3.
- 429 3. Andrews S. FastQC: A Quality Control Tool for High Throughput Sequence Data  
430 [Internet]2010;http://www.bioinformatics.babraham.ac.uk/projects/fastqc/. cited June  
431 1, 2018
- 432 4. Wingett SW, Andrews S. FastQ Screen: A tool for multi-genome mapping and  
433 quality control. *F1000Res.* 2018;7:1338.
- 434 5. Daley T, Smith AD. Predicting the molecular complexity of sequencing libraries. *Nat.*  
435 *Methods* 2013;10(4):325–327.
- 436 6. Wang L, Wang S, Li W. RSeQC: quality control of RNA-seq experiments.  
437 *Bioinformatics* 2012;28(16):2184–2185.
- 438 7. Okonechnikov K, Conesa A, García-Alcalde F. Qualimap 2: advanced multi-sample  
439 quality control for high-throughput sequencing data. *Bioinformatics* 2016;32(2):292–  
440 294.
- 441 8. Martin M. Cutadapt removes adapter sequences from high-throughput sequencing  
442 reads. *EMBnet j.* 2011;17(1):10.
- 443 9. Dobin A et al. STAR: ultrafast universal RNA-seq aligner.. *Bioinformatics*  
444 2013;29(1):15–21.

- 445 10. Harrow J et al. GENCODE: the reference human genome annotation for The  
446 ENCODE Project. *Genome Res.* 2012;22(9):1760–1774.
- 447 11. Li B, Dewey CN. RSEM: accurate transcript quantification from RNA-Seq data with  
448 or without a reference genome. *BMC Bioinformatics* 2011;12:323.
- 449 12. Leek JT, Johnson WE, Parker HS, Jaffe AE, Storey JD. The sva package for  
450 removing batch effects and other unwanted variation in high-throughput experiments.  
451 *Bioinformatics* 2012;28(6):882–883.
- 452 13. Liu J et al. An Integrated TCGA Pan-Cancer Clinical Data Resource to Drive High-  
453 Quality Survival Outcome Analytics. *Cell* 2018;173(2):400–416.e11.
- 454 14. Cancer Genome Atlas Research Network. Comprehensive genomic  
455 characterization of squamous cell lung cancers. *Nature* 2012;489(7417):519–525.
- 456 15. Wheeler DA, Roberts LR, The Cancer Genome Atlas Research Network.  
457 Comprehensive and integrative genomic characterization of hepatocellular carcinoma.  
458 *Cell* 2017;169(7):1327–1341.e23.
- 459 16. Cancer Genome Atlas Research Network. Comprehensive molecular profiling of  
460 lung adenocarcinoma. *Nature* 2014;511(7511):543–550.
- 461 17. McCarthy DJ, Chen Y, Smyth GK. Differential expression analysis of multifactor  
462 RNA-Seq experiments with respect to biological variation. *Nucleic Acids Res.*  
463 2012;40(10):4288–4297.
- 464 18. Ritchie ME et al. limma powers differential expression analyses for RNA-  
465 sequencing and microarray studies. *Nucleic Acids Res.* 2015;43(7):e47.
- 466 19. Subramanian A et al. Gene set enrichment analysis: a knowledge-based approach  
467 for interpreting genome-wide expression profiles. *Proc. Natl. Acad. Sci. USA*



468 2005;102(43):15545–15550.

469 20. Newman AM et al. Determining cell type abundance and expression from bulk  
470 tissues with digital cytometry. *Nat. Biotechnol.* 2019;37(7):773–782.

471 21. Newman AM et al. Robust enumeration of cell subsets from tissue expression  
472 profiles. *Nat. Methods* 2015;12(5):453–457.

473 22. Cantor JR et al. Physiologic medium rewires cellular metabolism and reveals uric  
474 acid as an endogenous inhibitor of UMP synthase. *Cell* 2017;169(2):258–272.e17.

475 23. Birsoy K et al. An essential role of the mitochondrial electron transport chain in cell  
476 proliferation is to enable aspartate synthesis. *Cell* 2015;162(3):540–551.

477
